# Supplementary material
Source: publisher figshare collection journal article supplement (https://gsapubs.figshare.com/ndownloader/files/23317172)
Supplement: Supplementary file 1 [file 23317172]

## Sheet: Intro
	Izanagi-Pacific ridge subduction revealed by a 56 to 46 Ma magmatic gap along the NE Asian margin
	Authors: Jeremy Tsung-Jui Wu, Jonny Wu
	Submitted to Geology; manuscript# G46183
	July 15 2019
	Introduction
	This spreadsheet accompanies Wu and Wu (submitted to Geology) and contains a database of 110 to 20 Ma magmatic rocks along NE Asia between xx to xx°N present latitudes.
	To compare the initial isotope value of the rocks with the same datum, we use published 87Rb/86Sr, 87Sr/86Sr ratios and Rb, Sr element concentration of the rocks, calculated their initial isotopic ratio (143Nd/144Nd)0 and (87Sr/86Sr)0, using the same decay constant: λ87Rb = 1.42 x 10-5 My-1 for Rb-Sr system and λ147Sm = 6.54 x 10-6 My-1 for Sm-Nd system (Lugmair and Marti, 1978). The (143Nd/144Nd…
	(87Sr/86Sr)0 = (87Sr/86Sr)sample(t)-(87Rb/86Sr)sample(0) x (eλ87t -1)
	εNd(T) = 104 x{[(143Nd/144Nd)sample(0)-(147Sm/144Nd)sample(0) x (eλ147t -1)]/[(143Nd/144Nd)CHUR(0) - (147Sm/144Nd)CHUR(0) x (eλ147t -1)] -1}
	λ87Rb = 1.42 x 10-5 My-1 (Lugmair and Marti, 1978)
	λ147Sm = 6.54 x 10-6 My-1 (Lugmair and Marti, 1978)
	(143Nd/144Nd)CHUR(0) = 0.512638 (Jacobsen and Wasserburg, 1980)
	(147Sm/144Nd)CHUR(0) = 0.1967 (Jacobsen and Wasserburg, 1980)
	References:
	1. Andrey I, R. (1994). Rb-Sr isochron ages of Cretaceous-Paleogene granitoid rocks in the central part of the Chugoku district, Southwest Japan. Jour. Geol. Soc. Japan, 100(9), 651-657.
	2. Arakawa, Y., & Takahashi, T. (1989). Effect of nonlinear gain on modulation dynamics in quantum-well lasers. Electronics Letters, 25(2), 169-170.
	3. Fujimaki, H., Miyajima, S., & Aoki, K. I. (1991). Rb-Sr chronological study of the Miyamoto composite mass, southern Abukuma, Fukushima prefecture, Notheast Japan. Journal of Mineralogy, Petrology and Economic Geology, 86(5), 216-225.
	4. Hattori, H. and Shibata, K. (1974) Concordant K-Ar and Rb-Sr ages of the Tottori granite, western Japan. Bull. Geol. Surv. Japan, 25, 157-173.
	5. Imaoka, T., Kiminami, K., Nishida, K., Takemoto, M., Ikawa, T., Itaya, T., ... & Iizumi, S. (2011). K–Ar age and geochemistry of the SW Japan Paleogene cauldron cluster: Implications for Eocene–Oligocene thermo-tectonic reactivation. Journal of Asian Earth Sciences, 40(2), 509-533.
	6. Imaoka, T., Nakashima, K., Kamei, A., Itaya, T., Ohira, T., Nagashima, M., ... & Kiji, M. (2014). Episodic magmatism at 105 Ma in the Kinki district, SW Japan: Petrogenesis of Nb-rich lamprophyres and adakites, and geodynamic implications. Lithos, 184, 105-131.
	7. Ishioka, J., & Iizumi, S. (2003). Petrochemical and Sr-Nd isotope investigations of Cretaceous intrusive rocks and their enclaves in the Togouchi-Yoshiwa district, northwest Hiroshima prefecture, SW Japan. Geochemical journal, 37(4), 449-470.
	8. Jahn, B. M. (2010). Accretionary orogen and evolution of the Japanese Islands: Implications from a Sr-Nd isotopic study of the Phanerozoic granitoids from SW Japan. American Journal of Science, 310(10), 1210-1249.
	9. Jahn, B. M., Usuki, M., Usuki, T., & Chung, S. L. (2014). Generation of Cenozoic granitoids in Hokkaido (Japan): Constraints from zircon geochronology, Sr-Nd-Hf isotopic and geochemical analyses, and implications for crustal growth. American Journal of Science, 314(2), 704-750.
	10. Jahn, B. M., Valui, G., Kruk, N., Gonevchuk, V., Usuki, M., & Wu, J. T. (2015). Emplacement ages, geochemical and Sr–Nd–Hf isotopic characterization of Mesozoic to early Cenozoic granitoids of the Sikhote-Alin Orogenic Belt, Russian Far East: Crustal growth and regional tectonic evolution. Journal of Asian Earth Sciences, 111, 872-918.
	11. Kagami, H., Iizumi, S., Tainosho, Y., & Owada, M. (1992). Spatial variations of Sr and Nd isotope ratios of Cretaceous-Paleogene granitoid rocks, Southwest Japan Arc. Contributions to Mineralogy and Petrology, 112(2-3), 165-177.
	12. Kagami, H., Iizumi, S., Tainosho, Y., & Owada, M. (1992). Spatial variations of Sr and Nd isotope ratios of Cretaceous-Paleogene granitoid rocks, Southwest Japan Arc. Contributions to Mineralogy and Petrology, 112(2-3), 165-177.
	13. Kruk, N. N., Simanenko, V. P., Gvozdev, V. I., Golozubov, V. V., Kovach, V. P., Serov, P. I., ... & Kuibida, M. L. (2014). Early Cretaceous granitoids of the Samarka terrane (Sikhote-Alin’): geochemistry and sources of melts. Russian Geology and Geophysics, 55(2), 216-236.
	14. Liao, J. P., Jahn, B. M., Alexandrov, I., Chung, S. L., Zhao, P., Ivin, V., & Usuki, T. (2018). Petrogenesis of Mid-Eocene granites in South Sakhalin, Russian Far East: Juvenile crustal growth and comparison with granitic magmatism in Hokkaido and Sikhote-Alin. Journal of Asian Earth Sciences.
	15. Iizumi, S. and Kagami, H. (1987). Initial Sr Isotope Ratio of the Hobutsu-san Granite, San'in Belt, SW Japan : Implications for Sr Isotope Variation of Cretaceous-Paleogene Igneous Rocks in the Inner Zone of SW Japan. Memoirs of the Faculty of Science, Shimane University, 21, 145-152.
	16. Maruyama, T., & Yamamoto, M. (1994). Preliminary study on Rb-Sr whole-rock age of Pre-Tertiary granitic rocks from the Taiheizan plutonometamorphic rocks, central part of Akita Prefecture. Northeastern Japan: Report of the Research Institute of Natural Resources, Mining College of Akita University, 59, 25-36.
	17. Matsumoto, I., Sawada, Y., Kagami, H. (1994). Rb-Sr isochron ages of Cretaceous Kisa Volcanics and granitoids in the central Chugoku district, Southwest Japan, and their geological significance. Jour. Geol. Soc. Japan, 100(6), 399-407.
	18. Morioka, K., Tainosho, Y., & Kagami, H. (2000). Rb–Sr isochron ages of the Cretaceous granitoids in the Ryoke belt, Kinki district, Southwest Japan. Island Arc, 9(1), 46-54.
	19. Nakajima, T., & Shirahase, T. (1987). Rb-Sr whole rock age of granitic rocks from the Sanyo zone in the central Hiroshima Prefecture. The Journal of the Japanese Association of Mineralogists, Petrologists and Economic Geologists, 82(11), 395-400.
	20. Ohtomo, Y., Kagami, H., & Hara, I. (1993). Origin of granitic rocks at the southern margin of the Ryoke belt in the Mikawaono-Toei area, central Japan--Rb-Sr dating and tectonic implications Jour. Geol. Soc. Japan, (42), 121-133.
	21. Okamura, S., Inaba, M., Adachi, Y., & Shinjo, R. (2016). Miocene-Pliocene mantle depletion event in the northern Fossa Magna, western NE Japan. Journal of Geodynamics, 97, 42-61.
	22. Rezanov, A., Shuto, K., & Iizumi, S. (1996). A Rb-Sr whole rock isochron age of the Gozu Granite, Niigata Prefecture, central Japan. Jour. Geol. Soc. Japan, 102(9), 828-831.
	23. Seki, T. (1978). Rb-Sr geochronology and petrogenesis of the late Mesozoic igneous rocks in the Inner Zone of the southwestern part of Japan. Memoirs of the Faculty of Science, Kyoto University, Series of Geol. & Mineral., 45(1), 71-110.
	24. Shibata, K., & Ishihara, S. (1979). Initial 87Sr/86Sr ratios of plutonic rocks from Japan. Contributions to Mineralogy and Petrology, 70(4), 381-390.
	25. Shibata, K., & Tanaka, T. (1987). Age of formation for the Ishikawa composite mass, Abukuma mountains, inferred from Nd and Sr isotopic systematics. The Journal of the Japanese Association of Mineralogists, Petrologists and Economic Geologists, 82(12), 433-440.
	26. Sudo, H., Honma, H., Sasada, M., Kagami, H. (1988). Sr isotope ratios of Late Cretaceous to Paleogene igneous rocks of the Misasa-Okutsu-Yubara area, eastern Sanin Province, Southwest Japan. Jour. Geol. Soc. Japan, 94(2), 113-128.
	27. Shuto, K., Ishimoto, H., Hirahara, Y., Sato, M., Matsui, K., Fujibayashi, N., ... & Rezanov, A. I. (2006). Geochemical secular variation of magma source during Early to Middle Miocene time in the Niigata area, NE Japan: Asthenospheric mantle upwelling during back-arc basin opening. Lithos, 86(1), 1-33.
	28. Takagi, T., Kagami, H., Iizumi, S. (1989). Petrography and geochemistry of two contrasting I-type granites, the Mitsumori and Ikuridani Granites, San'in Belt, Southwest Japan. Jour. Geol. Soc. Japan, 95(12), 905-918.
	29. Takagi, T., & Kagami, H. (1995). Rb Sr isochron ages and initial Sr isotope ratios of the Ukan granodiorite and Kayo granite, central Okayama prefecture, southwest Japan. Bull. Geol. Surv. Japan, 46, 219-224.
	30. Tanaka, S. (1987). Rb-Sr isotopic ages of the granitic rocks in the Tsurugidake-Kekachiyama area, northern Japan Alps. Jour. Geol. Soc. Japan, 93, 368-376.
	31. Terakado, Y., & Nohda, S. (1993). Rb-Sr dating of acidic rocks from the middle part of the Inner Zone of southwest Japan: tectonic implications for the migration of the Cretaceous to Paleogene igneous activity. Chemical Geology, 109(1-4), 69-87.
	32. Wu, J. T., Jahn, B. M., Nechaev, V., Chashchin, A., Popov, V., Yokoyama, K., & Tsutsumi, Y. (2017). Geochemical characteristics and petrogenesis of adakites in the Sikhote-Alin area, Russian Far East. Journal of Asian Earth Sciences, 145, 512-529.
	33. Yuhara, M. (1994). Timing of intrusion of the Otagiri granite with respect to the deformation and metamorphism in Ryoke belt in the Ina district, central Japan: Examination by Rb-Sr whole rock isochron ages. Journal of Mineralogy, Petrology and Economic Geology, 89(7), 269-284.
	34. Yuhara, M. (1998). Rb-Sr whole rock isochron ages and source materials of granitic rocks in Awaji Island, Southwest Japan Arc. Bulletin of the Geological Survey of Japan, 49, 477-491.
	35. Yuhara, M., & Kagami, H. (1999). Chronological and isotope geological study of the Takato granite in the Ina district of the Ryoke belt, Southwest Japan Arc. Jour. Geol. Soc. Japan, 105, 181-192.
	36. Yuhara, M., Miyazaki, T., Kagami, H., & Yuhara, M. (2003). Rb-Sr and K-Ar geochronology and petrogenesis of the Aji Granite in the eastern Sanuki district, Ryoke Belt, southwest Japan. Journal of Mineralogical and petrological Sciences, 98(1), 19-30.
	37. Zhao, P., Jahn, B. M., & Xu, B. (2017). Elemental and Sr-Nd isotopic geochemistry of Cretaceous to Early Paleogene granites and volcanic rocks in the Sikhote-Alin Orogenic Belt (Russian Far East): implications for the regional tectonic evolution. Journal of Asian Earth Sciences, 146, 383-401.
	38. Yuge, T., Imaoka, T., Iizumi, S. (1998). Whole-rock chemistry and Sr and Nd isotope ratios of Cretaceous rhyolites and granitoids in Abu district, Yamaguchi Prefecture, Southwest Japan. Jour. Geol. Soc. Japan, 104(3), 159-170.

## Sheet: SW Japan
Reference	Age (Ma)				147Sm/144Nd	143Nd/144Nd	87Rb/86Sr	87Sr/86Sr	εNd(T)	(87Sr/86Sr)0
Seki (1978)	84.5	±	1	Rb-Sr (WR)			143.7	116		0.707593
	92.9	±	4.4	Rb-Sr (Multiple)			134.1	112.2		0.704732
	94	±	4	Rb-Sr (Multiple)			78.8	284.3		0.707328
	112	±	4	Rb-Sr (WR)			240.3	159.2		0.705243
	112	±	4	Rb-Sr (WR)			84.71	225.5		0.705269
	112	±	4	Rb-Sr (WR)			150.4	241.7		0.705132
	112	±	4	Rb-Sr (WR)			172.3	173.5		0.705223
	69.9	±	4.3	Rb-Sr (WR)			169.5	98.8		0.709867
	69.9	±	4.3	Rb-Sr (WR)			247	68.44		0.710322
	69.9	±	4.3	Rb-Sr (WR)			221.7	71.97		0.710042
	69.9	±	4.3	Rb-Sr (WR)			188.9	89.93		0.71056
	79.7	±	5.5	Rb-Sr (WR)			109.3	103.4		0.706234
	79.7	±	5.5	Rb-Sr (WR)			110.2	236.6		0.705673
	79.7	±	5.5	Rb-Sr (WR)			97.7	159		0.705285
	82.6	±	0.8	U-Pb (Zr)			83	271		0.705259
	82.6	±	0.8	U-Pb (Zr)			20.6	427		0.705736
	82.6	±	0.8	U-Pb (Zr)			154	68.9		0.708504
	82.6	±	0.8	U-Pb (Zr)			135.1	86.32		0.707181
	82.6	±	0.8	U-Pb (Zr)			174.6	203.6		0.706386
	74	±	0.4	U-Pb (Zr)			287.5	19.01		0.707259
	74	±	0.4	U-Pb (Zr)			221.2	18.06		0.718513
	74	±	0.4	U-Pb (Zr)			247	27.16		0.709314
	74	±	0.4	U-Pb (Zr)			205.1	60.99		0.709963
	74	±	0.4	U-Pb (Zr)			252.2	26.8		0.709452
	74	±	0.4	U-Pb (Zr)			226	27.84		0.710387
	74	±	0.4	U-Pb (Zr)			434.4	18.35		0.712632
	121	±	35	Rb-Sr (WR)			118.5	223.2		0.709556
	121	±	35	Rb-Sr (WR)			141.7	121.7		0.709902
	121	±	35	Rb-Sr (WR)			122.7	118		0.708322
	121	±	35	Rb-Sr (WR)			125	113.9		0.709935
	121	±	35	Rb-Sr (WR)			140.2	105.9		0.709908
	121	±	35	Rb-Sr (WR)			114.9	193.4		0.709142
	121	±	35	Rb-Sr (WR)			64.83	326.9		0.710012
	105	±	8	Rb-Sr (WR)			235.5	166.7		0.707496
	105	±	8	Rb-Sr (WR)			245.9	71		0.708936
	105	±	8	Rb-Sr (WR)			261	67.95		0.707404
	105	±	8	Rb-Sr (WR)			271.5	50.2		0.708133
	105	±	8	Rb-Sr (WR)			128.5	214.6		0.708213
Kagami et al. (1988)	93.1	±	2.9	Rb-Sr (WR)			1.0024	0.70903		0.707704
	93.1	±	2.9	Rb-Sr (WR)			1.06271	0.70921		0.707804
	93.1	±	2.9	Rb-Sr (WR)			1.31468	0.70942		0.707681
	93.1	±	2.9	Rb-Sr (WR)			1.5452	0.70973		0.707686
	93.1	±	2.9	Rb-Sr (WR)			1.6891	0.70985		0.707615
	93.1	±	2.9	Rb-Sr (WR)			2.96149	0.71147		0.707552
	93.1	±	2.9	Rb-Sr (WR)			1.413	0.70955		0.707681
	93.1	±	2.9	Rb-Sr (WR)			1.94945	0.71037		0.707791
	93.1	±	2.9	Rb-Sr (WR)			2.73728	0.71113		0.707509
	93.1	±	2.9	Rb-Sr (WR)			3.20211	0.71214		0.707904
	93.1	±	2.9	Rb-Sr (WR)			4.10945	0.71312		0.707684
	93.1	±	2.9	Rb-Sr (WR)			5.71875	0.71529		0.707725
	93.1	±	2.9	Rb-Sr (WR)			7.27568	0.71735		0.707725
	87.78	±	0.88	U-Pb (Zr)			2.01854	0.71033		0.707663
	87.78	±	0.88	U-Pb (Zr)			2.80607	0.71101		0.707302
	89.82	±	0.67	U-Pb (Zr)			1.02942	0.70915		0.707949
	89.82	±	0.67	U-Pb (Zr)			0.991504	0.70844		0.707283
	83.46	±	0.8	U-Pb (Zr)			2.31026	0.71004		0.707345
	83.46	±	0.8	U-Pb (Zr)			2.23892	0.71001		0.707398
	81.82	±	0.64	U-Pb (Zr)			4.55839	0.71274		0.707423
	81.82	±	0.64	U-Pb (Zr)			10.3603	0.71907		0.706985
	81.59	±	0.55	U-Pb (Zr)			16.9802	0.72747		0.707204
	90.75	±	0.96	U-Pb (Zr)			38.4954	0.75456		0.708615
	85.9	±	1.1	U-Pb (Zr)			2.79798	0.71106		0.707721
	85.9	±	1.1	U-Pb (Zr)			2.8585	0.71112		0.707708
	81.59	±	0.55	U-Pb (Zr)			3.19492	0.71112		0.707307
	78.78	±	0.68	U-Pb (Zr)			4.43956	0.71252		0.707221
	78.78	±	0.68	U-Pb (Zr)			4.53768	0.71276		0.707344
	78.76	±	0.76	U-Pb (Zr)			2.76601	0.71073		0.707429
	84.44	±	0.7	U-Pb (Zr)			1.57788	0.70923		0.707347
Ishioka and Iizumi (2003)	85.6	±	4.7	Rb-Sr (WR)			1.04861	0.70759		0.706315
	85.6	±	4.7	Rb-Sr (WR)			0.986841	0.70757		0.70637
	85.6	±	4.7	Rb-Sr (WR)	0.093593	0.512421	0	0.70838	-3.10738	0.70838
	85.6	±	4.7	Rb-Sr (WR)			0.620486	0.70701		0.706255
	85.6	±	4.7	Rb-Sr (WR)			0	0.70799		0.70799
	85.6	±	4.7	Rb-Sr (WR)	0.114516	0.512463	0	0.70865	-2.51651	0.70865
	85.6	±	4.7	Rb-Sr (WR)	0.108727	0.512466	0	0.70814	-2.39474	0.70814
	85.6	±	4.7	Rb-Sr (WR)			0	0.70822		0.70822
	85.6	±	4.7	Rb-Sr (WR)		0.512506	0	0.70877		0.70877
	85.6	±	4.7	Rb-Sr (WR)	0.111718	0.512509	0.986002	0.70772	-1.58844	0.706521
	85.6	±	4.7	Rb-Sr (WR)			0	0.7088		0.7088
	85.6	±	4.7	Rb-Sr (WR)			0	0.71016		0.71016
	85.6	±	4.7	Rb-Sr (WR)			0	0.71352		0.71352
	85.6	±	4.7	Rb-Sr (WR)			0.705338	0.70659		0.705732
	85.6	±	4.7	Rb-Sr (WR)	0.123996	0.51252	0.542286	0.70653	-1.50797	0.70587
	85.6	±	4.7	Rb-Sr (WR)	0.134583	0.512529	0.707065	0.70676	-1.44803	0.7059
	85.6	±	4.7	Rb-Sr (WR)	0.113863	0.512455	1.22333	0.70735	-2.66548	0.705862
	85.6	±	4.7	Rb-Sr (WR)			0.920387	0.70689		0.705771
	85.6	±	4.7	Rb-Sr (WR)	0.130608	0.512508	0.778297	0.7068	-1.81433	0.705853
	85.6	±	4.7	Rb-Sr (WR)	0.141105	0.512487	0	0.70783	-2.33875	0.70783
	85.6	±	4.7	Rb-Sr (WR)	0.134472	0.512465	2.23832	0.70861	-2.69553	0.705888
	85.6	±	4.7	Rb-Sr (WR)			3.45171	0.70975		0.705552
	85.6	±	4.7	Rb-Sr (WR)			0.947259	0.70683		0.705678
	85.6	±	4.7	Rb-Sr (WR)			1.56904	0.70786		0.705952
	85.6	±	4.7	Rb-Sr (WR)	0.117273	0.512468	1.61683	0.70785	-2.44908	0.705884
	85.6	±	4.7	Rb-Sr (WR)			1.19014	0.7076		0.706152
	85.6	±	4.7	Rb-Sr (WR)			0.787059	0.7072		0.706243
	77.4	±	3.1	Rb-Sr (WR)	0.10574	0.512441	2.74219	0.70948	-2.94504	0.706464
	77.4	±	3.1	Rb-Sr (WR)		0.51246	5.9102	0.71294	-1.52976	0.706441
	77.4	±	3.1	Rb-Sr (WR)			5.89979	0.71308		0.706592
	77.4	±	3.1	Rb-Sr (WR)		0.512447	3.11664	0.70997	-1.7834	0.706543
	77.4	±	3.1	Rb-Sr (WR)		0.512418	2.43537	0.70922	-2.34921	0.706542
	77.4	±	3.1	Rb-Sr (WR)			2.71877	0.70957		0.70658
	77.4	±	3.1	Rb-Sr (WR)	0.114959	0.512431	2.83125	0.70955	-3.23123	0.706437
	77.4	±	3.1	Rb-Sr (WR)	0.120912	0.512489	1.8189	0.70788	-2.15841	0.70588
	77.4	±	3.1	Rb-Sr (WR)	0.128109	0.512462	2.05963	0.70816	-2.7563	0.705895
	77.4	±	3.1	Rb-Sr (WR)		0.512498	0.508788	0.7063	-0.788351	0.70574
Takagi and Kagami (1995)	92	±	6.5	Rb-Sr (WR)			1.18794	0.70853		0.706977
	92	±	6.5	Rb-Sr (WR)			1.20352	0.70853		0.706957
	92	±	6.5	Rb-Sr (WR)			1.29225	0.70862		0.706931
	92	±	6.5	Rb-Sr (WR)			1.45335	0.70881		0.70691
	92	±	6.5	Rb-Sr (WR)			1.68689	0.7092		0.706995
	92	±	6.5	Rb-Sr (WR)			1.76799	0.70928		0.706969
	92	±	6.5	Rb-Sr (WR)			1.99161	0.70953		0.706926
	66.9	±	9.1	Rb-Sr (WR)			0.704596	0.70802		0.70735
	66.9	±	9.1	Rb-Sr (WR)			0.756313	0.70812		0.707401
	66.9	±	9.1	Rb-Sr (WR)			0.97669	0.70827		0.707342
	66.9	±	9.1	Rb-Sr (WR)			1.39515	0.7087		0.707374
	81.2	±	5.5	Rb-Sr (WR)			0.537328	0.70741		0.70679
	81.2	±	5.5	Rb-Sr (WR)			0.639288	0.7076		0.706862
	81.2	±	5.5	Rb-Sr (WR)			0.731115	0.70774		0.706897
	81.2	±	5.5	Rb-Sr (WR)			1.50086	0.70856		0.706828
	81.2	±	5.5	Rb-Sr (WR)			1.61214	0.70868		0.70682
	81.2	±	5.5	Rb-Sr (WR)			1.77528	0.70878		0.706732
	81.2	±	5.5	Rb-Sr (WR)			1.92565	0.70917		0.706948
	81.2	±	5.5	Rb-Sr (WR)			2.29235	0.70948		0.706835
Yuhara et al. (1998)	89.4	±		K-Ar (Hbl)	0.11192	0.512243	1.88422	0.71165	-6.73953	0.709257
	89.4	±		K-Ar (Hbl)	0.11235	0.512264	1.73207	0.71152	-6.33471	0.70932
	89.4	±		K-Ar (Hbl)	0.116724	0.512269	3.11081	0.71329	-6.28706	0.709338
	89.4	±		K-Ar (Hbl)	0.104831	0.512261	2.20317	0.71154	-6.30744	0.708741
	89.4	±		K-Ar (Hbl)	0.139514	0.512351	0.736794	0.70831	-4.94719	0.707374
	89.4	±		K-Ar (Hbl)	0.0797896	0.512296	0.873538	0.70911	-5.33879	0.708
	83.2	±	1.7	Rb-Sr (WR)	0.115846	0.512323	2.83443	0.71133	-5.28735	0.707979
	83.2	±	1.7	Rb-Sr (WR)	0.106541	0.51228	1.42022	0.70968	-6.02751	0.708001
	83.2	±	1.7	Rb-Sr (WR)	0.105133	0.512293	1.34769	0.70968	-5.75891	0.708087
	83.2	±	1.7	Rb-Sr (WR)	0.102443	0.512304	0.995566	0.7095	-5.51573	0.708323
	83.2	±	1.7	Rb-Sr (WR)	0.133765	0.512325	7.77566	0.71721	-5.43862	0.708018
	83.2	±	1.7	Rb-Sr (WR)		0.5123	3.6065	0.71244		0.708177
	89.4	±	4.5	K-Ar (Hbl)	0.100174	0.512303	0.44325	0.70859	-5.56654	0.708094
	89.4	±	4.5	K-Ar (Hbl)	0.0993654	0.512307	0.76632	0.70891	-5.48037	0.708053
	89.4	±	4.5	K-Ar (Hbl)	0.138671	0.512341	0.618528	0.70833	-5.21182	0.707638
	89.4	±	4.5	K-Ar (Hbl)		0.512299	2.25379	0.7116		0.70908
	89.4	±	4.5	K-Ar (Hbl)	0.106039	0.51229	0.385835	0.70849	-5.87909	0.708059
	89.4	±	4.5	K-Ar (Hbl)	0.131714	0.512321	0.435848	0.70859	-5.53216	0.708103
	83	±			0.129722	0.512318	3.40934	0.7115	-5.53397	0.707479
	83	±				0.512281	1.58069	0.70957		0.707706
	87.7	±	4.4	K-Ar (Hbl)	0.111628	0.512306	0.907699	0.70865	-5.44625	0.707425
	87.7	±	4.4	K-Ar (Hbl)	0.105593	0.5123	0.794192	0.70892	-5.49012	0.707848
	87.7	±	4.4	K-Ar (Hbl)	0.132569	0.512325	1.28331	0.70901	-5.32946	0.707278
	87.7	±	4.4	K-Ar (Hbl)	0.108465	0.512302	2.21752	0.71044	-5.48593	0.707447
	87.7	±	4.4	K-Ar (Hbl)	0.113757	0.512291	1.77986	0.70975	-5.76474	0.707347
	87.7	±	4.4	K-Ar (Hbl)	0.119883	0.512307	1.01454	0.70924	-5.52683	0.70787
	89.6	±	4.5	K-Ar (Hbl)	0.107891	0.512317	1.07067	0.70885	-5.14098	0.707344
	89.6	±	4.5	K-Ar (Hbl)	0.107323	0.512324	0.953913	0.70867	-4.99723	0.707328
	89.6	±	4.5	K-Ar (Hbl)	0.102823	0.512326	1.09115	0.70886	-4.90133	0.707325
	89.6	±	4.5	K-Ar (Hbl)	0.105651	0.512289	0.282347	0.70823	-5.65901	0.707833
	75.5	±	5.8	Rb-Sr (WR)	0.122478	0.512311	5.64026	0.71394	-5.66477	0.70789
	75.5	±	5.8	Rb-Sr (WR)	0.106141	0.512327	3.02722	0.71108	-5.19517	0.707833
	75.5	±	5.8	Rb-Sr (WR)	0.12418	0.512319	5.72756	0.71416	-5.52508	0.708016
	75.5	±	5.8	Rb-Sr (WR)	0.0993375	0.512327	2.65261	0.71092	-5.12961	0.708075
	76.4	±	3.9	Rb-Sr (WR)	0.101821	0.512326	1.27901	0.7092	-5.16216	0.707812
	76.4	±	3.9	Rb-Sr (WR)	0.124551	0.512328	2.72401	0.71059	-5.34478	0.707633
	76.4	±	3.9	Rb-Sr (WR)	0.137203	0.512341	5.78328	0.7141	-5.21451	0.707822
	76.4	±	3.9	Rb-Sr (WR)	0.102226	0.51231	1.24932	0.70913	-5.47828	0.707774
	76.4	±	3.9	Rb-Sr (WR)	0.127789	0.512346	3.13509	0.71104	-5.02516	0.707637
	83.8	±	4.9	Rb-Sr (WR)	0.113383	0.512314	2.70256	0.71071	-5.43042	0.707492
	83.8	±	4.9	Rb-Sr (WR)	0.121835	0.512311	3.46482	0.7116	-5.57936	0.707475
	83.8	±	4.9	Rb-Sr (WR)	0.112907	0.512332	3.06225	0.71112	-5.07413	0.707474
	83.8	±	4.9	Rb-Sr (WR)	0.117867	0.51231	3.31239	0.71146	-5.55643	0.707516
	81.4	±	9	Rb-Sr (WR)	0.109996	0.512281	1.4671	0.70963	-6.03474	0.707877
	81.4	±	9	Rb-Sr (WR)	0.106281	0.512307	1.29803	0.70949	-5.48758	0.707939
	81.4	±	9	Rb-Sr (WR)	0.106791	0.512306	1.07947	0.70918	-5.51256	0.70789
	81.4	±	9	Rb-Sr (WR)	0.0874364	0.512266	0.740514	0.70883	-6.08525	0.707945
	81.4	±	9	Rb-Sr (WR)	0.111108	0.512278	1.69895	0.70994	-6.10521	0.70791
	74	±	12	Rb-Sr (WR)	0.122193	0.51233	3.17909	0.71152	-5.30556	0.708178
	74	±	12	Rb-Sr (WR)	0.149701	0.512332	6.46798	0.7148	-5.52634	0.708
Jahn et al. (2010)	72	±			0.133632	0.512175			-8.4538	0.7081
	64	±			0.185898	0.51222			-8.06698	0.70811
	64	±			0.184712	0.512198			-8.48652	0.70853
	64	±			0.219559	0.512223			-8.28339	0.70757
	72.6	±	1.5	Rb-Sr (Bt)	0.154945	0.512084			-10.4145	0.71108
	73.3	±	3.6	Rb-Sr (Bt)	0.211833	0.512257			-7.57645	0.69855
	73.3	±	3.6	Rb-Sr (Bt)	0.145076	0.512048			-11.0237	0.71052
	72.6	±	1.5	Rb-Sr (Bt)	0.157336	0.512145			-9.24694	0.70737
	72.6	±	1.5	Rb-Sr (Bt)	0.226239	0.512185			-9.09071	0.70849
	73.3	±	3.6	Rb-Sr (Bt)	0.187145	0.512147			-9.48945	0.71337
	90.5	±		Rb-Sr (WR)	0.132701	0.5124			-3.94931	0.70671
	90.5	±		Rb-Sr (WR)	0.199513	0.512419			-4.30345	0.70998
	90.5	±		Rb-Sr (WR)	0.199671	0.512427			-4.14908	0.70904
	90.5	±		Rb-Sr (WR)	0.214319	0.512446			-3.93729	0.70708
Yuge et al. (1998)	86.8	±	2.8	Rb-Sr (WR)	0.0431177	0.512567	4.3126	0.710762	0.280963	0.705554
	86.8	±	2.8	Rb-Sr (WR)	0.0885076	0.512581	4.61387	0.711096	0.0616723	0.705524																										3.58705	0.7119			0.707593
	86.8	±	2.8	Rb-Sr (WR)				0.711523		0.711523																										3.46078	0.7093			0.704732
	86.8	±	2.8	Rb-Sr (WR)				0.71415		0.71415																										0.802579	0.7084			0.707328
	86.8	±	2.8	Rb-Sr (WR)	0.0930704	0.512606	5.7912	0.712602	0.499947	0.705608																										4.37068	0.7122			0.705243
	86.8	±	2.8	Rb-Sr (WR)	0.122726	0.512618	10.3842	0.718497	0.412343	0.705956																										1.08774	0.707			0.705269
	86.8	±	2.8	Rb-Sr (WR)	0.107477	0.512619	7.9756	0.715122	0.597287	0.70549																										1.80181	0.708			0.705132
	86.8	±	2.8	Rb-Sr (WR)				0.71567		0.71567																										2.87557	0.7098			0.705223
	86.8	±	2.8	Rb-Sr (WR)	0.109084	0.512609	8.14046	0.715267	0.384749	0.705436																										4.96765	0.7148			0.709867
	86.8	±	2.8	Rb-Sr (WR)						0																										10.4502	0.7207			0.710322
	86.8	±	2.8	Rb-Sr (WR)	0.0985898	0.512581	3.43478	0.709531	-0.0477119	0.705383																										8.91975	0.7189			0.710042
	79.7	±	5.3	Rb-Sr (Multiple)	0.112813	0.512594	4.1021	0.709997	0.0516255	0.705043																										6.08227	0.7166			0.71056
	79.7	±	5.3	Rb-Sr (Multiple)				0.710117		0.710117																										3.06082	0.7097			0.706234
	79.7	±	5.3	Rb-Sr (Multiple)	0.114749	0.512582	4.5193	0.710798	-0.203516	0.70534																										1.34867	0.7072			0.705673
	79.7	±	5.3	Rb-Sr (Multiple)						0																										1.77925	0.7073			0.705285
	79.7	±	5.3	Rb-Sr (Multiple)	0.106983	0.512618	5.8627	0.712361	0.583135	0.70528																										0.886844	0.7063			0.705259
	79.7	±	5.3	Rb-Sr (Multiple)				0.724643		0.724643																										0.139694	0.7059			0.705736
	79.7	±	5.3	Rb-Sr (Multiple)				0.730049		0.730049																										6.47202	0.7161			0.708504
	79.7	±	5.3	Rb-Sr (Multiple)	0.111791	0.512607	14.4091	0.722178	0.316349	0.704776																										4.53192	0.7125			0.707181
Shibata and Ishihara (1979)	80	±					0.275771	0.7092		0.708887																										2.48316	0.7093			0.706386
	80	±					0.00839304	0.7089		0.70889																										43.792	0.7533			0.707259
	80	±					0.0132219	0.7077		0.707685																										35.4655	0.7558			0.718513
	80	±					0.0189255	0.7096		0.709578																										26.3333	0.737			0.709314
	94.5	±	3.1	CHIME			0.403676	0.7069		0.706358																										9.73746	0.7202			0.709963
	75	±	5.1	CHIME			0.447773	0.7081		0.707623																										27.2489	0.7381			0.709452
	70	±					1.06209	0.7117		0.710644																										23.5059	0.7351			0.710387
	70	±					0.271124	0.7081		0.70783																										68.5476	0.7847			0.712632
	70	±					1.86813	0.7123		0.710442																										1.53731	0.7122			0.709556
	90	±					0.0279094	0.7081		0.708064																										3.37146	0.7157			0.709902
	90	±					0.423746	0.7083		0.707758																										3.01093	0.7135			0.708322
	90	±					0.477297	0.7082		0.70759																										3.17779	0.7154			0.709935
	90	±					1.04803	0.7095		0.70816																										3.83346	0.7165			0.709908
	90	±					0.161765	0.7073		0.707093																										1.72029	0.7121			0.709142
	90	±					0.344963	0.7079		0.707459																										0.574248	0.711			0.710012
	90	±					0.129332	0.707		0.706835																										4.09066	0.7136			0.707496
	90	±					1.0409	0.7085		0.707169																										10.0286	0.7239			0.708936
	80	±					0.291015	0.7056		0.705269																										11.1222	0.724			0.707404
	70	±					0.11213	0.7055		0.705388																										15.6605	0.7315			0.708133
	70	±					0.0746289	0.7055		0.705426																										1.73385	0.7108			0.708213
	66.8	±	6.2	Rb-Sr			0.28956	0.7052		0.704925
	66.8	±	6.2	Rb-Sr			0.897939	0.7064		0.705548
	100	±					0.0377687	0.7053		0.705246
	100	±					0.0364226	0.7057		0.705648
	100	±					0.949757	0.7063		0.70495
	120	±					0.176503	0.706		0.705699
	90	±					0.553453	0.7068		0.706092
	90	±					0.654127	0.707		0.706163
	40	±					0.0264438	0.7035		0.703485
	40	±					0.311834	0.704		0.703823
	40	±					0.0689429	0.7032		0.703161
	20	±					0.831557	0.7036		0.703364
	20	±					0.409217	0.7063		0.706184
	20	±					0.130302	0.7061		0.706063
	20	±					0.118672	0.7056		0.705566
	20	±					0.122217	0.7053		0.705265
	20	±					0.0208317	0.7052		0.705194
Matsumoto et al. (1994)	83.9	±	13.2	Rb-Sr (WR)			3.47046	0.71144		0.707303
	83.9	±	13.2	Rb-Sr (WR)			2.91503	0.71089		0.707415
	83.9	±	13.2	Rb-Sr (WR)			2.9337	0.71112		0.707623
	83.9	±	13.2	Rb-Sr (WR)			4.14416	0.71236		0.70742
	83.9	±	13.2	Rb-Sr (WR)			2.12701	0.70991		0.707374
	84.4	±	6.3	Rb-Sr (WR)			3.83302	0.71023		0.705633
	84.4	±	6.3	Rb-Sr (WR)			7.5184	0.71442		0.705404
	84.4	±	6.3	Rb-Sr (WR)			2.51866	0.70864		0.70562
	84.4	±	6.3	Rb-Sr (WR)			1.54519	0.70758		0.705727
	84.4	±	6.3	Rb-Sr (WR)			2.08121	0.70824		0.705744
	84.4	±	6.3	Rb-Sr (WR)			6.19903	0.71339		0.705956
	84.4	±	6.3	Rb-Sr (WR)			1.1152	0.70674		0.705403
	84.4	±	6.3	Rb-Sr (WR)			1.11215	0.70725		0.705916
Nikajima and Shirahase (1987)	80.4	±	2.8	Rb-Sr (WR)			1.25608	0.70745		0.706015
	80.4	±	2.8	Rb-Sr (WR)			0.127829	0.70607		0.705924
	80.4	±	2.8	Rb-Sr (WR)			14.3229	0.72204		0.705679
	80.4	±	2.8	Rb-Sr (WR)			36.9189	0.74937		0.707196
	90.5	±	5.1	Rb-Sr (WR)			4.16191	0.71156		0.706208
	90.5	±	5.1	Rb-Sr (WR)			2.53165	0.70952		0.706264
	90.5	±	5.1	Rb-Sr (WR)			2.6073	0.7098		0.706447
	90.5	±	5.1	Rb-Sr (WR)			0.876519	0.7074		0.706273
	90.5	±	5.1	Rb-Sr (WR)			0.827166	0.70738		0.706316
	88.2	±	15.3	Rb-Sr (WR)			4.95072	0.71328		0.707076
	88.2	±	15.3	Rb-Sr (WR)			6.95018	0.71578		0.70707
	88.2	±	15.3	Rb-Sr (WR)			8.0559	0.71614		0.706044
	88.2	±	15.3	Rb-Sr (WR)			7.13469	0.71563		0.706689
	88.2	±	15.3	Rb-Sr (WR)			7.32365	0.71559		0.706412
	88.2	±	15.3	Rb-Sr (WR)			12.8906	0.72356		0.707405
Rezanov et al. (1994)	28.9	±	5.8	Rb-Sr (Multiple)			6.47561	0.707524		0.704866
	28.9	±	5.8	Rb-Sr (Multiple)			6.59817	0.707623		0.704915
	28.9	±	5.8	Rb-Sr (Multiple)			7.4676	0.707919		0.704854
	28.9	±	5.8	Rb-Sr (Multiple)			7.89193	0.708237		0.704998
	28.9	±	5.8	Rb-Sr (Multiple)			8.87163	0.708449		0.704808
	40.4	±	2.9	Rb-Sr (Multiple)			1.65463	0.704901		0.703952
	40.4	±	2.9	Rb-Sr (Multiple)			2.68877	0.705893		0.70435
	40.4	±	2.9	Rb-Sr (Multiple)			15.0771	0.712642		0.70399
	44.3	±	6.1	Rb-Sr (Multiple)			0.32366	0.704586		0.704382
	44.3	±	6.1	Rb-Sr (Multiple)			0.780374	0.704976		0.704485
	44.3	±	6.1	Rb-Sr (Multiple)			0.786848	0.705072		0.704577
	44.3	±	6.1	Rb-Sr (Multiple)			0.883798	0.705127		0.704571
	44.3	±	6.1	Rb-Sr (Multiple)			2.22572	0.70583		0.704429
	44.3	±	6.1	Rb-Sr (Multiple)			2.30777	0.705957		0.704505
	44.3	±	6.1	Rb-Sr (Multiple)			2.36913	0.705928		0.704437
	58	±	1.5	Rb-Sr (Multiple)			5.24565	0.710455		0.706133
	58	±	1.5	Rb-Sr (Multiple)			6.31336	0.711313		0.706111
	58	±	1.5	Rb-Sr (Multiple)			11.832	0.716034		0.706285
	72.9	±	2.8	Rb-Sr (Multiple)			12.5739	0.720143		0.70712
	72.9	±	2.8	Rb-Sr (Multiple)			13.4439	0.721248		0.707324
	72.9	±	2.8	Rb-Sr (Multiple)			17.6919	0.725829		0.707505
	80.5	±	3.9	Rb-Sr (Multiple)			2.54293	0.708895		0.705987
	80.5	±	3.9	Rb-Sr (Multiple)			3.41842	0.709386		0.705476
	80.5	±	3.9	Rb-Sr (Multiple)			40.83	0.752419		0.705719
Sudo et al. (1988)	91	±		Rb-Sr (WR)			4.8488	0.70869		0.702489
	36	±		Rb-Sr (WR)			7.71805	0.71528		0.70541
	91	±		Rb-Sr (WR)			3.22843	0.70696		0.702831
	36	±		Rb-Sr (WR)			1.15924	0.7075		0.706018
	36	±		Rb-Sr (WR)			0.553743	0.70637		0.705662
	85.2	±	1.7	Rb-Sr (WR)			1.01562	0.70749		0.706261
	85.2	±	1.7	Rb-Sr (WR)			0.0937987	0.70549		0.705376
	85.2	±	1.7	Rb-Sr (WR)			0.180774	0.70568		0.705461
	85.2	±	1.7	Rb-Sr (WR)			0.350935	0.70574		0.705315
	85.2	±	1.7	Rb-Sr (WR)			0.395785	0.70585		0.705371
	69.6	±	2.2	Rb-Sr (Multiple)			0.346213	0.7056		0.705258
	85.2	±	1.7	Rb-Sr (WR)			0.504512	0.706		0.705389
	70	±	0.02	Rb-Sr (Multiple)			0.487402	0.70599		0.705505
	85.2	±	1.7	Rb-Sr (WR)			0.966577	0.70656		0.70539
	85.2	±	1.7	Rb-Sr (WR)			0.795596	0.70626		0.705297
	85.2	±	1.7	Rb-Sr (WR)			0.847933	0.7061		0.705074
	85.2	±	1.7	Rb-Sr (WR)			0.344232	0.70575		0.705333
	85.2	±	1.7	Rb-Sr (WR)			0.414819	0.70617		0.705668
	85.2	±	1.7	Rb-Sr (WR)			0.458957	0.7059		0.705344
	85.2	±	1.7	Rb-Sr (WR)			0.534215	0.70616		0.705513
	85.2	±	1.7	Rb-Sr (WR)			0.827314	0.70614		0.705138
	85.2	±	1.7	Rb-Sr (WR)			1.91448	0.70766		0.705342
	85.2	±	1.7	Rb-Sr (Multiple)			0.401154	0.70588		0.705487
	85.2	±	1.7	Rb-Sr (Multiple)			0.694832	0.7064		0.705719
	65.4	±	3	Rb-Sr (WR)			0.674086	0.70633		0.705704
	69.2	±	2.2	Rb-Sr (Multiple)			0.519928	0.70616		0.70565
	69.2	±	2.2	Rb-Sr (Multiple)			0.808482	0.70665		0.705857
	69.2	±	2.2	Rb-Sr (Multiple)			0.853742	0.70671		0.705873
	69.2	±	2.2	Rb-Sr (Multiple)			0.780935	0.70668		0.705914
	69.2	±	2.2	Rb-Sr (Multiple)			1.35215	0.70773		0.706385
	69.2	±	2.2	Rb-Sr (Multiple)			1.55304	0.70789		0.706368
	69.2	±	2.2	Rb-Sr (Multiple)			1.6351	0.70809		0.706487
	69.2	±	2.2	Rb-Sr (Multiple)			1.39541	0.70768		0.706312
	69.2	±	2.2	Rb-Sr (Multiple)			1.14858	0.70741		0.706284
	69.2	±	2.2	Rb-Sr (Multiple)			3.01402	0.70898		0.706025
	69.2	±	2.2	Rb-Sr (Multiple)			7.00124	0.71237		0.705507
	63.9	±	0.2	Rb-Sr (Multiple)			1.17406	0.70703		0.705964
	63.9	±	0.2	Rb-Sr (Multiple)			1.1324	0.70679		0.705762
	63.9	±	0.2	Rb-Sr (Multiple)			1.30605	0.70704		0.705854
	63.9	±	0.2	Rb-Sr (Multiple)			1.11899	0.7066		0.705584
	63.9	±	0.2	Rb-Sr (Multiple)			1.03382	0.70663		0.705692
	63.9	±	0.2	Rb-Sr (Multiple)			1.57536	0.70728		0.70585
	63.9	±	0.2	Rb-Sr (Multiple)			3.14574	0.7088		0.705944
	63.9	±	0.2	Rb-Sr (Multiple)			7.87228	0.71357		0.706424
	63.9	±	0.2	Rb-Sr (Multiple)			12.6151	0.71906		0.707608
	63.9	±	0.2	Rb-Sr (Multiple)			49.3599	0.75379		0.708982
	60.3	±	0.1	Rb-Sr (WR)			1.69921	0.70696		0.705504
	60.3	±	0.1	Rb-Sr (WR)			2.15862	0.70735		0.705501
	60.3	±	0.1	Rb-Sr (WR)			1.73397	0.70725		0.705765
	60.3	±	0.1	Rb-Sr (WR)			1.387	0.70693		0.705742
	61	±	0.3	Rb-Sr (WR)			2.14666	0.7075		0.70564
	61	±	0.3	Rb-Sr (WR)			3.61853	0.7083		0.705164
	61	±	0.3	Rb-Sr (WR)			5.07272	0.70994		0.705544
	60.4	±	0.2	Rb-Sr (WR)			5.70722	0.71126		0.706363
	60.4	±	0.2	Rb-Sr (WR)			6.91862	0.71258		0.706643
	75	±		Rb-Sr (WR)			11.6322	0.72209		0.709695
	36	±	1	Rb-Sr (WR)			1.2057	0.70582		0.705203
	36	±	1	Rb-Sr (WR)			2.32743	0.70647		0.70528
	36	±	1	Rb-Sr (WR)			1.47844	0.70619		0.705434
	36	±	1	Rb-Sr (WR)			0.676245	0.70563		0.705284
	36	±	1	Rb-Sr (WR)			0.697207	0.70627		0.705913
	36	±	1	Rb-Sr (WR)			13.4439	0.72298		0.716106
Iizumi et al. (1984)	65	±	0.3	Rb-Sr (WR)			1.20489	0.70599		0.704877
	65	±	0.3	Rb-Sr (WR)			2.68294	0.70741		0.704933
	65	±	0.3	Rb-Sr (WR)			9.08069	0.71319		0.704805
	65	±	0.3	Rb-Sr (WR)			12.3943	0.71602		0.704575
	65	±	0.3	Rb-Sr (WR)			12.6699	0.71662		0.70492
	65	±	0.3	Rb-Sr (WR)			1.14746	0.70598		0.70492
	65	±	0.3	Rb-Sr (WR)			2.0727	0.70721		0.705296
	65	±	0.3	Rb-Sr (WR)			3.16484	0.70726		0.704338
	65	±	0.3	Rb-Sr (WR)			6.51247	0.71056		0.704546
	65	±	0.3	Rb-Sr (WR)			1.66051	0.70636		0.704827
	65	±	0.3	Rb-Sr (WR)			6.42178	0.71048		0.70455
Hattori and Shibatta (1974)	64.8	±	2	Rb-Sr (WR-Bt)			1.51025	0.7076		0.70621
	64.8	±	2	Rb-Sr (WR-Bt)			4.83577	0.71		0.705548
	64.8	±	2	Rb-Sr (WR-Bt)			7.36634	0.7126		0.705819
	64.8	±	2	Rb-Sr (WR-Bt)			19.8367	0.7243		0.706039
Iizumi and Kagami (1987)	72.3	±	2.8	Rb-Sr (WR-Bt)			5.60416	0.71253		0.706773
	72.3	±	2.8	Rb-Sr (WR-Bt)			6.45254	0.71311		0.706482
	72.3	±	2.8	Rb-Sr (WR-Bt)			4.29729	0.71121		0.706796
	72.3	±	2.8	Rb-Sr (WR-Bt)			5.5433	0.707387		0.701693
Terakado and Nohda (1993)	61.9	±	0.9	Rb-Sr (Multiple)			1.63461	0.708731		0.707294
	60.4	±	0.9	Rb-Sr (Multiple)			2.72638	0.710017		0.707678
	60.4	±	0.9	Rb-Sr (Multiple)			1.20107	0.708638		0.707607
	60.4	±	0.9	Rb-Sr (Multiple)			2.03711	0.710009		0.708261
	60.4	±	0.9	Rb-Sr (Multiple)			4.2955	0.711676		0.70799
	60.4	±	0.9	Rb-Sr (Multiple)			3.45525	0.710537		0.707572
	62.6	±	1.6	Rb-Sr (Multiple)			0.814557	0.708332		0.707608
	62.6	±	1.6	Rb-Sr (Multiple)			2.98609	0.710682		0.708026
	62.6	±	1.6	Rb-Sr (Multiple)			0.56041	0.708614		0.708116
	62.6	±	1.6	Rb-Sr (Multiple)			0.498461	0.707608		0.707165
	62.6	±	1.6	Rb-Sr (Multiple)			8.65414	0.715588		0.707892
	72.1	±	1.5	Rb-Sr (Multiple)			4.38406	0.711857		0.707366
	71.9	±	1.5	Rb-Sr (Multiple)			7.6608	0.716192		0.708366
	71.2	±	1.5	Rb-Sr (Multiple)			35.8803	0.743993		0.707698
	71.9	±	1.5	Rb-Sr (Multiple)			30.0186	0.739365		0.708701
	71.9	±	1.5	Rb-Sr (Multiple)			8.53718	0.716863		0.708142
	71.9	±	1.5	Rb-Sr (Multiple)			1.32131	0.708478		0.707128
	71.9	±	1.5	Rb-Sr (Multiple)			1.12783	0.70833		0.707178
	71.9	±	1.5	Rb-Sr (Multiple)			10.7863	0.719367		0.708349
	82.1	±	0.5	U-Pb (Zr)			0.826805	0.708311		0.707488
	82.1	±	0.5	U-Pb (Zr)			13.4468	0.720701		0.707309
	82.1	±	0.5	U-Pb (Zr)			4.38919	0.711671		0.7073
	82.1	±	0.5	U-Pb (Zr)			4.0235	0.711294		0.707287
	82.1	±	0.5	U-Pb (Zr)			1.69466	0.70976		0.708072
	82.1	±	0.5	U-Pb (Zr)			1.5615	0.70892		0.707365
	82.1	±	0.5	U-Pb (Zr)			2.26853	0.710795		0.708536
	82.1	±	0.5	U-Pb (Zr)			2.42422	0.710672		0.708258
	82.1	±	0.5	U-Pb (Zr)			2.06353	0.710277		0.708222
	82.1	±	0.5	U-Pb (Zr)			3.2914	0.711223		0.707945
	80.9	±	1.1	Rb-Sr (Multiple)			2.67926	0.710746		0.707666
	80.4	±	2	Rb-Sr (Multiple)			1.5627	0.70977		0.707985
	85.8	±	1.7	Rb-Sr (Multiple)			1.84668	0.710342		0.708091
	85.8	±	1.7	Rb-Sr (Multiple)			2.68466	0.71146		0.708187
	85.8	±	1.7	Rb-Sr (Multiple)			2.97717	0.71182		0.708191
	83	±	0.5	U-Pb (Zr)			1.8288	0.709839		0.707802
	83	±	0.5	U-Pb (Zr)			1.71035	0.709721		0.707816
	83	±	0.5	U-Pb (Zr)			3.90068	0.71226		0.707915
Takagi et al. (1989)	80.4	±	3.3	Rb-Sr (Multiple)			1.21945	0.70651		0.705117
	80.4	±	3.3	Rb-Sr (Multiple)			2.23594	0.70784		0.705286
	80.4	±	3.3	Rb-Sr (Multiple)			4.27812	0.70991		0.705023
	80.4	±	3.3	Rb-Sr (Multiple)			24.1891	0.73305		0.705418
	80.4	±	3.3	Rb-Sr (Multiple)			5.38979	0.7141		0.707943
	80.4	±	3.3	Rb-Sr (Multiple)			6.28222	0.71508		0.707904
	80.4	±	3.3	Rb-Sr (Multiple)			7.05994	0.71625		0.708185
	80.4	±	3.3	Rb-Sr (Multiple)			36.5237	0.74394		0.702218
	80.4	±	3.3	Rb-Sr (Multiple)			2.71397	0.71099		0.70789
Yuhara and Kagami (1999)	85.2	±	6.6	Rb-Sr (WR)	0.106296	0.512264	0.114325	0.70882	-6.31404	0.708682
	85.2	±	6.6	Rb-Sr (WR)	0.105991	0.512286	0.209826	0.70878	-5.88147	0.708526
	85.2	±	6.6	Rb-Sr (WR)	0.118393	0.512262	0.177393	0.70885	-6.48461	0.708635
	85.2	±	6.6	Rb-Sr (WR)	0.119719	0.512268	0.129552	0.70895	-6.38196	0.708793
	85.2	±	6.6	Rb-Sr (WR)	0.111696	0.512281	0.173833	0.70882	-6.04107	0.70861
	85.2	±	6.6	Rb-Sr (WR)	0.110705	0.512253	0.147138	0.70889	-6.5766	0.708712
	85.2	±	6.6	Rb-Sr (WR)	0.134241	0.512291	0.194867	0.70895	-6.09113	0.708714
	85.2	±	6.6	Rb-Sr (WR)	0.10734	0.512252	0.206976	0.70887	-6.55952	0.708619
	85.2	±	6.6	Rb-Sr (WR)	0.116973	0.512288	1.14933	0.71022	-5.96188	0.708829
	85.2	±	6.6	Rb-Sr (WR)	0.137677	0.512288	0.204952	0.70897	-6.18703	0.708722
	85.2	±	6.6	Rb-Sr (WR)	0.127166	0.512239	0.198451	0.70891	-7.02877	0.70867
	85.2	±	6.6	Rb-Sr (WR)	0.121623	0.512314	1.7214	0.70971	-5.50516	0.707626
	85.2	±	6.6	Rb-Sr (WR)	0.101455	0.512316	1.19961	0.70913	-5.24681	0.707678
	85.2	±	6.6	Rb-Sr (WR)	0.115538	0.512298	1.07957	0.70922	-5.75116	0.707913
	85.2	±	6.6	Rb-Sr (WR)			0.252236	0.70894		0.708635
	85.2	±	6.6	Rb-Sr (WR)	0.10555	0.512315	1.16743	0.70939	-5.31086	0.707977
	85.2	±	6.6	Rb-Sr (WR)	0.12818	0.512335	1.98188	0.71011	-5.16673	0.707711
	85.2	±	6.6	Rb-Sr (WR)	0.117228	0.5123	1.40927	0.70944	-5.73052	0.707734
	85.2	±	6.6	Rb-Sr (WR)	0.115973	0.512302	1.81844	0.70993	-5.67784	0.707729
	85.2	±	6.6	Rb-Sr (WR)	0.11687	0.512302	2.09127	0.7103	-5.68761	0.707768
	85.2	±	6.6	Rb-Sr (WR)	0.129759	0.512296	2.74711	0.71071	-5.94484	0.707384
	85.2	±	6.6	Rb-Sr (WR)	0.11641	0.512339	1.82956	0.70994	-4.96069	0.707725
	85.2	±	6.6	Rb-Sr (WR)	0.126709	0.512299	1.56122	0.70965	-5.85313	0.70776
	85.2	±	6.6	Rb-Sr (WR)	0.117644	0.512312	1.7756	0.71035	-5.50091	0.708201
	85.2	±	6.6	Rb-Sr (WR)	0.11673	0.512341	2.14884	0.71084	-4.92514	0.708239
Yuhara et al. (2003)	82.9	±	8	Rb-Sr (WR)	0.118536	0.512303	0.566632	0.70831	-5.70913	0.707643
	82.9	±	8	Rb-Sr (WR)
	80.4	±	1.1	K-Ar (Bt)			0.557933	0.70845		0.707793
	83.5	±	1.1	K-Ar (Hbl)			0.871728	0.70866		0.707633
	82.9	±	8	Rb-Sr (WR)
	79.4	±	0.8	K-Ar (Bt)	0.110538	0.512334	0.397787	0.70818	-5.01966	0.707711
	80.4	±	0.8	K-Ar (Bt)			0.405112	0.70791		0.707433
	82.9	±	8	Rb-Sr (WR)
	82.9	±	8	Rb-Sr (WR)	0.112999	0.512367	0.508339	0.70832	-4.40183	0.707721
	82.9	±	8	Rb-Sr (WR)	0.109255	0.512337	0.549312	0.7084	-4.94755	0.707753
	79.6	±	0.8	K-Ar (Bt)			0.700664	0.70856		0.707735
	82.9	±	8	Rb-Sr (WR)	0.109592	0.512329	0.709742	0.70857	-5.1072	0.707734
	82.9	±	8	Rb-Sr (WR)
	79.9	±	0.9	K-Ar (Bt)	0.107957	0.512363	0.800605	0.70865	-4.42653	0.707707
	82.9	±	8	Rb-Sr (WR)
	82.3	±	0.8	K-Ar (Hbl & Bt)			0.676281	0.70905		0.708261
	83	±	0.8	K-Ar (Hbl & Bt)	0.0770915	0.512327	0.578152	0.70903	-4.81454	0.708356
	82.1	±	3	K-Ar (WR & Bt)	0.0883438	0.512349	1.34076	0.70921	-4.50321	0.707646
	86.8	±	0.9	K-Ar (Hbl & Bt)	0.0843734	0.512288	1.91316	0.70983	-5.65178	0.707598
	77.2	±	0.5	K-Ar (WR & Bt)	0.106567	0.512349	1.46017	0.70913	-4.56426	0.707192
	87.1	±	0.6	K-Ar (WR & Bt)	0.102242	0.512371	2.01244	0.70969	-4.08345	0.707019
	87.1	±	0.6	K-Ar (WR & Bt)	0.106153	0.512346	1.65463	0.70929	-4.61786	0.707094
	93.4	±	0.9	K-Ar (Hbl & Bt)	0.11658	0.51235	1.53278	0.70967	-4.66412	0.707636
Yuhara (1994)	71.1	±	6.8	Rb-Sr (WR)			1.67752	0.71321		0.711515
	71.1	±	6.8	Rb-Sr (WR)	0.107334	0.511885	2.31129	0.7148	-13.8804	0.712465
	71.1	±	6.8	Rb-Sr (WR)			3.09372	0.71543		0.712305
	71.1	±	6.8	Rb-Sr (WR)	0.114586	0.511864	3.41325	0.71572	-14.3559	0.712272
	71.1	±	6.8	Rb-Sr (WR)	0.111326	0.511898	2.88052	0.71531	-13.663	0.7124
	71.1	±	6.8	Rb-Sr (WR)	0.113785	0.511942	4.40964	0.71672	-12.8269	0.712266
	71.1	±	6.8	Rb-Sr (WR)	0.109562	0.511914	2.60458	0.71506	-13.3348	0.712429
	71.1	±	6.8	Rb-Sr (WR)	0.111575	0.511925	3.45115	0.716	-13.1385	0.712514
	71.1	±	6.8	Rb-Sr (WR)			4.04642	0.71634		0.712253
	71.1	±	6.8	Rb-Sr (WR)	0.117815	0.511944	6.22419	0.71864	-12.8244	0.712353
	99	±	10.9	Rb-Sr (WR)	0.112154	0.512092	0.286854	0.71053	-9.58502	0.710126
	99	±	10.9	Rb-Sr (WR)	0.112155	0.512079	0.270256	0.71074	-9.83869	0.71036
	99	±	10.9	Rb-Sr (WR)			0.315795	0.70748		0.707036
	99	±	10.9	Rb-Sr (WR)	0.118554	0.512114	0.457851	0.7107	-9.23664	0.710056
	99	±	10.9	Rb-Sr (WR)			0.613988	0.70983		0.708966
	99	±	10.9	Rb-Sr (WR)	0.11328	0.512061	0.64429	0.71142	-10.2041	0.710514
	99	±	10.9	Rb-Sr (WR)	0.113967	0.512058	1.70866	0.71274	-10.2713	0.710336
	99	±	10.9	Rb-Sr (WR)	0.122839	0.512025	1.60748	0.71273	-11.0273	0.710469
	99	±	10.9	Rb-Sr (WR)	0.113761	0.512113	1.97083	0.71288	-9.19558	0.710107
	99	±	10.9	Rb-Sr (WR)			2.64631	0.71376		0.710037
	99	±	10.9	Rb-Sr (WR)	0.110008	0.512141	1.03785	0.71182	-8.60182	0.71036
	99	±	10.9	Rb-Sr (WR)			1.00156	0.70988		0.708471
	99	±	10.9	Rb-Sr (WR)	0.116804	0.512043	2.09041	0.71338	-10.5999	0.710439
	99	±	10.9	Rb-Sr (WR)			7.51177	0.71941		0.708843
	99	±	10.9	Rb-Sr (WR)	0.155672	0.512103	5.55321	0.71772	-9.92032	0.709908
	99	±	10.9	Rb-Sr (WR)			1.9304	0.71177		0.709054
	92.7	±	13.8	Rb-Sr (WR)			0.813371	0.7101		0.709029
	92.7	±	13.8	Rb-Sr (WR)			6.37032	0.71596		0.707569
	92.7	±	13.8	Rb-Sr (WR)			3.57051	0.71287		0.708167
	92.7	±	13.8	Rb-Sr (WR)	0.133111	0.512194	3.85218	0.71396	-7.91068	0.708886
	92.7	±	13.8	Rb-Sr (WR)	0.125589	0.512177	3.14739	0.71332	-8.15337	0.709174
	92.7	±	13.8	Rb-Sr (WR)	0.124027	0.512208	2.78633	0.71258	-7.53003	0.70891
	92.7	±	13.8	Rb-Sr (WR)			0.661629	0.70999		0.709118
	92.7	±	13.8	Rb-Sr (WR)	0.117059	0.512226	2.40453	0.71219	-7.09637	0.709023
	92.7	±	13.8	Rb-Sr (WR)	0.124708	0.512209	4.09801	0.71455	-7.51858	0.709152
	92.7	±	13.8	Rb-Sr (WR)	0.115295	0.512193	2.09735	0.71193	-7.71938	0.709167
Yuhara et al. (1995)	85.9	±	1.7	CHIME Monazite			1.18505	0.70813		0.706684
	85.9	±	1.7	CHIME Monazite			0.888552	0.70745		0.706366
	85.9	±	1.7	CHIME Monazite			0.856338	0.70747		0.706425
	85.9	±	1.7	CHIME Monazite			1.95453	0.7094		0.707014
	85.9	±	1.7	CHIME Monazite			2.21642	0.70978		0.707075
	85.9	±	1.7	CHIME Monazite			1.81171	0.7093		0.707089
Morioka et al. (2000)	70.8	±	1.4	K-Ar (Bt)			0.823064	0.71019		0.709318
	70.8	±	1.4	K-Ar (Bt)			0.737558	0.7101		0.709318
	70.8	±	1.4	K-Ar (Bt)			0.513735	0.70982		0.709276
	70.8	±	1.4	K-Ar (Bt)			2.26423	0.71181		0.70941
	70.8	±	1.4	K-Ar (Bt)			1.64386	0.71092		0.709178
	70.8	±	1.4	K-Ar (Bt)			0.683015	0.7101		0.709376
	70.8	±	1.4	K-Ar (Bt)			0.845019	0.71037		0.709474
	70.8	±	1.4	K-Ar (Bt)			0.575013	0.71005		0.709441
	70.8	±	1.4	K-Ar (Bt)			0.626353	0.70992		0.709256
	70.8	±	1.4	K-Ar (Bt)			0.657645	0.71032		0.709623
	71.8	±	0.1	Rb-Sr (WR)			3.13294	0.71213		0.708934
	71.8	±	0.1	Rb-Sr (WR)			2.38461	0.71118		0.708748
	71.8	±	0.1	Rb-Sr (WR)			1.45515	0.71021		0.708726
	78.3	±	3	Rb-Sr (WR)			5.73497	0.71387		0.70749
	78.3	±	3	Rb-Sr (WR)			14.0208	0.72297		0.707372
	78.3	±	3	Rb-Sr (WR)			11.4808	0.72031		0.707538
	78.3	±	3	Rb-Sr (WR)			5.70925	0.71428		0.707929
	78.3	±	3	Rb-Sr (WR)			10.1116	0.71899		0.707741
	78.3	±	3	Rb-Sr (WR)			1.5336	0.7094		0.707694
	78.3	±	3	Rb-Sr (WR)			1.79019	0.70955		0.707558
	85.1	±	18.3	Rb-Sr (WR)			0.228758	0.70754		0.707263
	85.1	±	18.3	Rb-Sr (WR)			0.223215	0.70758		0.70731
	85.1	±	18.3	Rb-Sr (WR)			0.0859631	0.70737		0.707266
	85.1	±	18.3	Rb-Sr (WR)			0.170017	0.7075		0.707294
	85.1	±	18.3	Rb-Sr (WR)			0.309791	0.70764		0.707265
	72.8	±	2	Rb-Sr (WR)			9.01255	0.71798		0.708658
	72.8	±	2	Rb-Sr (WR)			22.4409	0.73266		0.70945
	72.8	±	2	Rb-Sr (WR)			2.43899	0.71161		0.709087
	72.8	±	2	Rb-Sr (WR)			1.70676	0.71069		0.708925
	72.8	±	2	Rb-Sr (WR)			3.59454	0.71256		0.708842
	72.8	±	2	Rb-Sr (WR)			4.12731	0.71317		0.708901
Ohtomo et al. (1993)	79.3	±	0.9	Rb-Sr (Multiple)			1.50013	0.7089		0.70721
	72.3	±	14.1	Rb-Sr (Multiple)			0.487196	0.70748		0.70698
	72.3	±	14.1	Rb-Sr (Multiple)			0.997357	0.70818		0.707156
	72.3	±	14.1	Rb-Sr (Multiple)			0.512647	0.70762		0.707093
	72.3	±	14.1	Rb-Sr (Multiple)			1.15489	0.70831		0.707124
	72.3	±	14.1	Rb-Sr (Multiple)			1.17511	0.70826		0.707053
	72.3	±	14.1	Rb-Sr (Multiple)			1.18001	0.709		0.707788
	72.3	±	14.1	Rb-Sr (Multiple)			0.64204	0.70865		0.707991
	151.6	±	18.3	Rb-Sr (Multiple)			1.19523	0.7085		0.707456
	151.6	±	18.3	Rb-Sr (Multiple)			1.82009	0.70873		0.70714
	61.5	±	1.4	Rb-Sr (Multiple)			0.505905	0.70758		0.707138
	151.6	±	18.3	Rb-Sr (Multiple)			0.80295	0.70785		0.707148
	61.5	±	1.4	Rb-Sr (Multiple)			1.06691	0.70806		0.707128
Tanaka and Kagami (1987)	61.5	±	1.4	Rb-Sr (Multiple)			2.01054	0.70999		0.708011
	61.5	±	1.4	Rb-Sr (Multiple)			2.07172	0.71008		0.70804
	61.5	±	1.4	Rb-Sr (Multiple)			2.33432	0.71012		0.707822
	69.3	±	5.1	Rb-Sr (Multiple)			2.35732	0.7104		0.708079
	69.3	±	5.1	Rb-Sr (Multiple)			3.36592	0.71136		0.708046
Imaoka et al. (2011)	36.7	±	0.9	K-Ar (Hbl)	0.139351	0.512701	0.261596	0.705257	1.49762	0.705121
	41.5	±	1.6	K-Ar (Bt)	0.122011	0.512742	0.759931	0.70524	2.42446	0.704792
	43.8	±	1.1	K-Ar (Bt)	0.125608	0.512747	1.03293	0.705448	2.52384	0.704805
	39.3	±	0.9	K-Ar (Hbl)	0.139567	0.512739	0.851647	0.705293	2.25691	0.704818
	38.4	±	2.1	K-Ar (Hbl)	0.142125	0.5127	0.0783841	0.705096	1.45676	0.705056
	34	±	1.8	K-Ar (Hbl)	0.12799	0.512645	1.00542	0.70581	0.435531	0.705323
	35.4	±	1.8	K-Ar (WR)	0.15749	0.51278	0.0425824	0.704755	2.94735	0.704734
	38.1	±	0.9	K-Ar (Hbl)	0.10464	0.512873	0.125271	0.704557	5.03214	0.704489
	43	±	1	K-Ar (WR)	0.143685	0.512722	0.174902	0.704807	1.92966	0.7047
	30	±	1.7	K-Ar (WR)	0.145161	0.51275	0.00334108	0.704719	2.38223	0.704718
	30	±	1.7	K-Ar (WR)	0.145908	0.512938	0.0934065	0.704751	6.04695	0.704711
	36	±	0.8	K-Ar (Bt)	0.136821	0.512794	0.276736	0.704678	3.31842	0.704536
	32	±	0.7	K-Ar (Bt)	0.121318	0.512795	4.21178	0.706093	3.37063	0.704179
	41.8	±	1	K-Ar (WR)	0.142072	0.512753	0.0258075	0.704628
	44.5	±	1	K-Ar (Bt)	0.147486	0.512747	0.0152668	0.704632	2.38898	0.704623
	44.5	±	1	K-Ar (Bt)	0.141218	0.512717	0.0581805	0.704594
	43.2	±	1	K-Ar (Bt)	0.11955	0.512667	1.17203	0.705445	0.99106	0.704726
	31.2	±	1.7	K-Ar (Hbl)	0.130855	0.512802	0.799834	0.704615	3.46152	0.704261
	31.2	±	1.7	K-Ar (Hbl)	0.104041	0.512876	0.0538716	0.70373	5.07819	0.703702
	30.9	±	1.7	K-Ar (Hbl)		0.512739	0.804914	0.705604	2.88651	0.705187
	36.8	±	0.9	K-Ar (Hbl)	0.164209	0.512833	0.0300751	0.704276	3.95096	0.704261
	36.5	±	1.9	K-Ar (Hbl)	0.199527	0.512774	0.0119653	0.704737	2.64069	0.704731
Imaoka et al. (2014)	101.6	±	2.3	K-Ar (Hbl)	0.10388	0.512657	0.0456981	0.704588	1.57454	0.704522
	101.6	±	2.3	K-Ar (Hbl)	0.112863	0.51266	0.337524	0.705607	1.51657	0.70512
	101.6	±	2.3	K-Ar (Hbl)	0.110378	0.512657	0.109906	0.705412	1.49026	0.705253
	101.6	±	2.3	K-Ar (Hbl)	0.109439	0.512591	0.0725628	0.7054	0.214657	0.705295
	101.6	±	2.3	K-Ar (Hbl)	0.129794	0.512447			-2.85906
	101.6	±	2.3	K-Ar (Hbl)	0.135154	0.512549	0.164731	0.704763	-0.938354	0.704525
	101.6	±	2.3	K-Ar (Hbl)	0.113246	0.512648	0.314739	0.704595	1.30197	0.70413
	101.6	±	2.3	K-Ar (Hbl)	0.0986883	0.512602	0.132602	0.703979	0.56746	0.703788
	101.6	±	2.3	K-Ar (Hbl)	0.097293	0.512567	0.214363	0.704245	-0.0973786	0.703936
	101.6	±	2.3	K-Ar (Hbl)	0.106309	0.512649	0.16377	0.703915	1.41349	0.703673
Sato et al. (2013)	27.9	±	1.1	K-Ar (WR)	0	0.512948	0.0586154	0.704392	6.74781	0.704369
	27.9	±	1.1	K-Ar (WR)	0	0.513009	0.0467275	0.703762	7.93782	0.703743
	27.9	±	1.1	K-Ar (WR)	0	0.512933	0.0502763	0.703639	6.45519	0.703619
	27.9	±	1.1	K-Ar (WR)	0.179479	0.513127	0.0210223	0.70283	9.60087	0.702822
	27.9	±	1.1	K-Ar (WR)	0	0.513142	0.0573157	0.702905	10.5324	0.702882

## Sheet: NE Japan
Reference	Age (Ma)				147Sm/144Nd	143Nd/144Nd	87Rb/86Sr	87Sr/86Sr	εNd(T)	(87Sr/86Sr)0
Rezanov et al. (1996)	93.6	±	3.8	Rb-Sr (WR)			1.60372	0.707387		0.705254
	93.6	±	3.8	Rb-Sr (WR)			8.34106	0.716353		0.705259
	93.6	±	3.8	Rb-Sr (WR)			2.27132	0.708328		0.705307
	93.6	±	3.8	Rb-Sr (WR)			9.72922	0.718454		0.705514
	93.6	±	3.8	Rb-Sr (WR)			23.937	0.737132		0.705296
	93.6	±	3.8	Rb-Sr (WR)			1.58691	0.707612		0.705501
	93.6	±	3.8	Rb-Sr (WR)			2.64454	0.708917		0.7054
Arakawa and Takahashi (1989)	61.6	±	4.3	Rb-Sr (WR)			1.63132	0.71436		0.712932
	61.6	±	4.3	Rb-Sr (WR)			1.33356	0.7142		0.713033
	61.6	±	4.3	Rb-Sr (WR)			1.41976	0.71412		0.712878
	61.6	±	4.3	Rb-Sr (WR)			2.39035	0.71499		0.712898
	61.6	±	4.3	Rb-Sr (WR)			2.33963	0.71495		0.712903
	61.6	±	4.3	Rb-Sr (WR)			1.68221	0.7144		0.712928
	61.6	±	4.3	Rb-Sr (WR)			1.2791	0.71414		0.713021
	61.6	±	4.3	Rb-Sr (WR)			0.638502	0.70873		0.708171
	61.6	±	4.3	Rb-Sr (WR)			0.760755	0.70928		0.708614
	61.6	±	4.3	Rb-Sr (WR)			0.799616	0.70956		0.70886
	61.6	±	4.3	Rb-Sr (WR)			0.961223	0.70925		0.708409
	61.6	±	4.3	Rb-Sr (WR)			1.01574	0.70932		0.708431
	61.6	±	4.3	Rb-Sr (WR)			0.775287	0.70883		0.708152
	61.6	±	4.3	Rb-Sr (WR)			1.42089	0.71152		0.710277
	61.6	±	4.3	Rb-Sr (WR)			1.18222	0.71176		0.710725
	61.6	±	4.3	Rb-Sr (WR)			1.02541	0.71183		0.710933
	61.6	±	4.3	Rb-Sr (WR)			1.57088	0.71186		0.710485
	61.6	±	4.3	Rb-Sr (WR)			1.41362	0.71186		0.710623
	61.6	±	4.3	Rb-Sr (WR)			1.16226	0.71164		0.710623
	61.6	±	4.3	Rb-Sr (WR)			1.25114	0.71112		0.710025
	61.6	±	4.3	Rb-Sr (WR)			1.21803	0.711		0.709934
	61.6	±	4.3	Rb-Sr (WR)			1.51331	0.71375		0.712426
	61.6	±	4.3	Rb-Sr (WR)			1.86835	0.71355		0.711915
	61.6	±	4.3	Rb-Sr (WR)			1.13932	0.71176		0.710763
	61.6	±	4.3	Rb-Sr (WR)			1.0706	0.7114		0.710463
	61.6	±	4.3	Rb-Sr (WR)			1.08238	0.7131		0.712153
	61.6	±	4.3	Rb-Sr (WR)			0.934205	0.71226		0.711442
	61.6	±	4.3	Rb-Sr (WR)			1.74464	0.7123		0.710773
	60.5	±		K-Ar (Bt)			1.4121	0.71209		0.710876
	60.5	±		K-Ar (Bt)			1.54257	0.71232		0.710994
	60.5	±		K-Ar (Bt)			1.86299	0.71301		0.711409
	60.5	±		K-Ar (Bt)			1.62395	0.7125		0.711104
	61.6	±	4.3	Rb-Sr (WR)			0.488336	0.70823		0.707803
Shibata (1987)	106.4	±	3.5	Rb-Sr (WR)			1.12897	0.7072		0.705493
	106.4	±	3.5	Rb-Sr (WR)			0.673487	0.70649		0.705472
	106.4	±	3.5	Rb-Sr (WR)			1.02575	0.7073		0.705749
	106.4	±	3.5	Rb-Sr (WR)			0.664385	0.70655		0.705545
	106.4	±	3.5	Rb-Sr (WR)			0.677798	0.70653		0.705505
	106.4	±	3.5	Rb-Sr (WR)			0.81866	0.70679		0.705552
	106.4	±	3.5	Rb-Sr (WR)			1.57678	0.70816		0.705776
	111.6	±	2.4	Rb-Sr (WR)			2.92354	0.710985		0.706348
	111.6	±	2.4	Rb-Sr (WR)			2.76753	0.71087		0.706481
	106.4	±	3.5	Rb-Sr (WR)			2.46593	0.70928		0.705551
	106.4	±	3.5	Rb-Sr (WR)			7.2412	0.71634		0.705391
	106.4	±	3.5	Rb-Sr (WR)			1.24318	0.70733		0.70545
	106.4	±	3.5	Rb-Sr (WR)			1.08575	0.706875		0.705233
	106.4	±	3.5	Rb-Sr (WR)			18.1387	0.73296		0.705534
	106.4	±	3.5	Rb-Sr (WR)			0.376405	0.70605		0.705481
	106.4	±	3.5	Rb-Sr (WR)			1.76578	0.7083		0.70563
	111.6	±	2.4	Rb-Sr (WR)			1.05731	0.70813		0.706453
	111.6	±	2.4	Rb-Sr (WR)			1.17662	0.70833		0.706464
	106.4	±	3.5	Rb-Sr (WR)			4.53294	0.71234		0.705486
	111.6	±	2.4	Rb-Sr (WR)			7.28975	0.71806		0.706499
Tanaka et al. (1999)	112.6	±	1	U-Pb (Zr)	0.138486	0.51265	2.8635	0.705501	1.08655	0.700833
	112.6	±	1	U-Pb (Zr)	0.127954	0.512586	0.20358	0.705704	-0.008029	0.705372
	112.6	±	1	U-Pb (Zr)	0.126426	0.512614	0.206119	0.705593	0.560688	0.705257
	112.6	±	1	U-Pb (Zr)	0.125717	0.512612	0.237293	0.705641	0.532047	0.705254
	112.6	±	1	U-Pb (Zr)	0.129528	0.512617	0.30539	0.705618	0.57381	0.70512
	112.6	±	1	U-Pb (Zr)	0.127152	0.512615	0.385156	0.705697	0.569577	0.705069
	112.6	±	1	U-Pb (Zr)	0.144235	0.512644	0.470627	0.70604	0.885298	0.705273
	112.6	±	1	U-Pb (Zr)	0.116155	0.512548	4.50192	0.70599	-0.576747	0.698652
	112.6	±	1	U-Pb (Zr)	0.0943338	0.512523	0.618895	0.706265	-0.745037	0.705256
	112.6	±	1	U-Pb (Zr)	0.0847246	0.512589	0.351249	0.705735	0.683497	0.705162
Shibata and Ishihara (1979)	96	±					2.22977	0.7085		0.705458
	100	±					0.199697	0.7053		0.705016
	100	±					0.860079	0.7069		0.705678
	100	±					0.252576	0.7062		0.705841
	100	±					0.551543	0.7055		0.704716
	100	±					0.0343691	0.7053		0.705251
	100	±					0.0496389	0.7056		0.705529
	100	±					0.801116	0.7063		0.705162
	70	±					0.0820615	0.7089		0.708818
	70	±					1.42712	0.7135		0.712081
	70	±					1.08585	0.7132		0.71212
	90	±					2.78663	0.7111		0.707536
	80	±					0.582105	0.7073		0.706638
	80	±					2.05386	0.7102		0.707865
	80	±					0.660294	0.7062		0.705449
	20	±					0.235938	0.7049		0.704833
	20	±					0.242648	0.7052		0.705131
	20	±					0.126218	0.7055		0.705464
	20	±					0.886941	0.7053		0.705048
	20	±					0.183848	0.7056		0.705548
Fujimaki et al. (1991)	120						0.218385	0.70559		0.705218
	120						0.228378	0.70553		0.705141
	120						0.2326	0.70558		0.705183
	120						0.413945	0.70594		0.705234
	120						0.413036	0.70587		0.705166
	120						0.569858	0.70607		0.705098
	120						0.655944	0.70639		0.705271
	120						0.670788	0.70629		0.705146
	119						0.877921	0.70639		0.704905
	119						0.904686	0.70646		0.70493
	119						0.979986	0.70649		0.704833
	119						1.13657	0.70683		0.704908
	119						1.26513	0.70704		0.7049
Maruyama and Yamamoto (1994)	99.7						0.471412	0.706117		0.705449
	99.7						0.489489	0.706114		0.705421
	99.7						0.744903	0.706373		0.705318
	99.7						1.0505	0.70667		0.705182
	99.7						2.544	0.709228		0.705624
	99.7						1.86162	0.707994		0.705357
	99.7						0.498546	0.706229		0.705523
	99.7						0.51107	0.70615		0.705426
Rezanov et al. (1996)	93.6	±	3.8	Rb-Sr (WR)			1.60372	0.707387		0.705254
	93.6	±	3.8	Rb-Sr (WR)			8.34106	0.716353		0.705259
	93.6	±	3.8	Rb-Sr (WR)			2.27132	0.708328		0.705307
	93.6	±	3.8	Rb-Sr (WR)			9.72922	0.718454		0.705514
	93.6	±	3.8	Rb-Sr (WR)			23.937	0.737132		0.705296
	93.6	±	3.8	Rb-Sr (WR)			1.58691	0.707612		0.705501
	93.6	±	3.8	Rb-Sr (WR)			2.64454	0.708917		0.7054
Shuto et al. (2006)	22				0.129793	0.512589	0.396464	0.707711	-0.768083	0.707587
	22				0.184442	0.512551	0.262654	0.707493	-1.66279	0.707411
	22				0.13305	0.512518	0.506334	0.707607	-2.1623	0.707449
	22				0.129723	0.512515	0.656103	0.707822	-2.21148	0.707617
	22				0.138979	0.512529	0.32248	0.707883	-1.96435	0.707782
	22				0.131821	0.512543	0.574055	0.707637	-1.67115	0.707458
	22						0.270617	0.707847		0.707762
	22						0.0676542	0.707511		0.70749
	22				0.148358	0.5125	0.224175	0.70795	-2.55641	0.70788
	21				0.136624	0.512529	0.138199	0.707488	-1.9654	0.707447
	21						1.25745			-0.000375028
	21				0.123444	0.512459	0.266773	0.708337	-3.29564	0.708257
	21				0.127008	0.512538	0.878332	0.707807	-1.76406	0.707545
	21				0.125205	0.512527	0.698648	0.707714	-1.97382	0.707506
	21				0.129706	0.512498	0.939375	0.707868	-2.55161	0.707588
	21						0.674767	0.707817		0.707616
	21						0.193456	0.707656		0.707598
	21						0.16183	0.707933		0.707885
	21						0.645096	0.707604		0.707412
	21				0.124652	0.51252	0.32958	0.707723	-2.10889	0.707625
	21				0.130264	0.512509	0.41275	0.708036	-2.33852	0.707913
	21				0.123791	0.512494	0.521059		-2.61379	-0.000155403
	21						0.326619	0.707713		0.707616
	21				0.129549	0.512536	1.53214	0.708029	-1.80989	0.707572
	21				0.133114	0.512519	0.219126	0.70764	-2.15108	0.707575
	21						0.139148	0.707672		0.70763
	21						0.1651	0.707599		0.70755
	21						0.57	0.707915		0.707745
	20				0.124812	0.512417	0.160058	0.708411	-4.12781	0.708366
	20				0.124271	0.512455	0.255168	0.708351	-3.38512	0.708279
	20				0.130264	0.51254	0.377687	0.707825	-1.74225	0.707718
	20				0.139016	0.512551	0.721777	0.707727	-1.54999	0.707522
	20				0.136414	0.512565	0.577287	0.707724	-1.27024	0.70756
	20				0.108317	0.512527	0.674441	0.70776	-1.93984	0.707568
	20						0.35596	0.707754		0.707653
	20				0.132247	0.512553	0.439646	0.707916	-1.4937	0.707791
	20				0.123497	0.512574	0.180622	0.705937	-1.06171	0.705886
	20				0.121498	0.512565	0.154204	0.705956	-1.23218	0.705912
	20				0.126131	0.512626	0.171632	0.705617	-0.0540174	0.705568
	20				0.121772	0.512612	0.179225	0.705962	-0.316003	0.705911
	20				0.123204	0.512604	0.179572	0.705668	-0.475722	0.705617
	20				0.122623	0.512607	0.172955	0.705959	-0.415716	0.70591
	20				0.123791	0.512636	0.186996	0.705952	0.147034	0.705899
	20				0.124551	0.512638	0.158353	0.705889	0.184111	0.705844
	20				0.10076	0.512629	0.1539	0.705899	0.0692487	0.705855
	20				0.119583	0.51261	0.164009	0.705902	-0.349435	0.705855
	20				0.119652	0.512419	0.785125	0.707142	-4.07562	0.706919
	20				0.120244	0.512362	1.20457	0.70797	-5.18909	0.707628
	20				0.111611	0.512371	2.40989	0.708413	-4.99148	0.707728
	20				0.110133	0.512519	3.92112	0.708382	-2.10054	0.707268
Okamura et al. (2016)	24.34	±	1.77	K-Ar (WR)	0.143462	0.512595	0.421132	0.70683	-0.673512	0.706684
	24.34	±	1.77	K-Ar (WR)	0.12323	0.512758	0.326036	0.705042	2.56914	0.704929
	22.82	±	0.57	K-Ar (WR)	0.124151	0.512636	0.17071	0.705965	0.172222	0.70591
	21			K-Ar (WR)	0.126831	0.512614	0.127634	0.706367	-0.280983	0.706329
	21			K-Ar (WR)	0.137302	0.51273	0.173026	0.704591	1.95388	0.704539
	21			K-Ar (WR)	0.128956	0.512698	0.684702	0.705759	1.35199	0.705555
	24.4	±	0.1	Ar-Ar	0.124085	0.512589	0.313987	0.706841	-0.729829	0.706732

## Sheet: Hokkaido
Reference	Age (Ma)				147Sm/144Nd	143Nd/144Nd	87Rb/86Sr	87Sr/86Sr	εNd(T)	(87Sr/86Sr)0
Shibata and Ishihara (1979)	25						0.0321733	0.703		0.702989
	25						0.342	0.704		0.703879
	20						0.358959	0.7054		0.705298
	40						0.609161	0.705		0.704654
Kawano et al. (1993)	104	±	16	Rb-Sr (WR)			0.112889	0.70617		0.706003
	104	±	16	Rb-Sr (WR)			1.28202	0.70724		0.705345
	104	±	16	Rb-Sr (WR)			1.14956	0.70701		0.705311
	104	±	16	Rb-Sr (WR)			0.989244	0.7069		0.705438
	104	±	16	Rb-Sr (WR)			1.50372	0.70763		0.705408
	104	±	16	Rb-Sr (WR)	0.129952	0.512505	1.33198	0.70732	-1.70897	0.705351
	104	±	16	Rb-Sr (WR)			2.08427	0.70812		0.70504
	104	±	16	Rb-Sr (WR)	0.123084	0.51245	2.81838	0.70972	-2.69095	0.705555
Takanashi et al. (2011)	31.9	±	0.8	Zr FT	0.154418	0.512672	5.87752	0.706925	0.835395	0.704262
Jahn et al. (2014)	45.7	±	0.5	U-Pb (Zr)	0.142826	0.512672	1.57073	0.707121	0.977489	0.706101
	44.8	±	0.5	U-Pb (Zr)	0.146116	0.51282	4.09706	0.707017	3.83984	0.70441
	37	±	0.5	U-Pb (Zr)	0.149499	0.512806	2.08763	0.705564	3.50032	0.704467
	45	±	0.5	U-Pb (Zr)	0.137246	0.512781	1.15548	0.705666	3.13121	0.704927
	45	±	0.5	U-Pb (Zr)	0.143096	0.512785	1.73653	0.705946	3.17566	0.704836

## Sheet: Sikhote-Alin
Reference	Age (Ma)				Age (Ma)	147Sm/144Nd	143Nd/144Nd	87Rb/86Sr	87Sr/86Sr	εNd(T)	(87Sr/86Sr)0
Jahn et al. (2015)	65.6	±	0.9	U-Pb (Zr)	65.6	0.132258	0.512543	0.601101	0.705894	-1.30695	0.705334
	57.1	±	0.4	U-Pb (Zr)	57.1	0.12727	0.512568	3.6398	0.708052	-0.865069	0.7051
	64	±	0.7	U-Pb (Zr)	64	0.117157	0.512516	1.22194	0.706652	-1.72554	0.705541
	70.5	±	0.9	U-Pb (Zr)	70.5	0.113697	0.512551	1.49293	0.706831	-0.959528	0.705336
	70.7	±	0.8	U-Pb (Zr)	70.7	0.117601	0.512539	1.96901	0.707364	-1.21061	0.705386
	82.7	±	0.8	U-Pb (Zr)	82.7	0.113131	0.51251	2.63154	0.708559	-1.60971	0.705467
	70.8	±	0.8	U-Pb (Zr)	70.8	0.126722	0.512509	0.728906	0.706449	-1.88584	0.705716
	77.7	±	0.9	U-Pb (Zr)	77.7	0.127035	0.512502	1.93959	0.707735	-1.95343	0.705594
	80.8	±	0.8	U-Pb (Zr)	80.8	0.107188	0.512468	2.01518	0.708111	-2.38786	0.705798
	78.1	±	0.8	U-Pb (Zr)	78.1	0.0951816	0.512459	2.19007	0.708547	-2.48555	0.706117
	74.4	±	0.9	U-Pb (Zr)	74.4	0.155683	0.512409	13.1026	0.721149	-4.07351	0.707299
	86	±	0.8	U-Pb (Zr)	86	0.130759	0.51258	6.75742	0.713472	-0.404782	0.705215
	88.3	±	0.8	U-Pb (Zr)	88.3	0.121228	0.512595	3.86769	0.709852	0.0135874	0.704999
	92.4	±	0.8	U-Pb (Zr)	92.4	0.112747	0.512391	3.35549	0.710498	-3.82411	0.706092
	91.5	±	0.8	U-Pb (Zr)	91.5	0.110379	0.512423	4.2778	0.711447	-3.19252	0.705885
	67.8	±	0.8	U-Pb (Zr)	67.8	0.118914	0.512293	0.0819931	0.706972	-6.05047	0.706893
	92.9	±	0.9	U-Pb (Zr)	92.9	0.100235	0.512564	0.915575	0.706582	-0.298744	0.705373
	57.8	±	1.1	U-Pb (Zr)	57.8	0.165569	0.512651	71.8431	0.767241	0.489217	0.708251
	102	±	1	U-Pb (Zr)	102	0.113514	0.51245	2.15871	0.708179	-2.58261	0.70505
	108.1	±	1.3	U-Pb (Zr)	108.1	0.130603	0.512548	2.92777	0.710603	-0.849866	0.706105
	108.1	±	1.1	U-Pb (Zr)	108.1	0.117682	0.512738	0.68457	0.705076	3.0409	0.704024
	108.8	±	0.8	U-Pb (Zr)	108.8	0.108225	0.512358	1.07743	0.708169	-4.24292	0.706503
	105.9	±	1	U-Pb (Zr)	105.9	0.103919	0.512563	1.15661	0.706298	-0.217478	0.704557
Kruk et al.(2014)	105	±			105	0.127748	0.512455			-2.64651
	100	±			100	0.114754	0.512532			-1.02223
	100	±			100	0.117232	0.512544			-0.819711
	102	±			102	0.157038	0.512407			-3.99085
	102	±			102	0.123733	0.512458			-2.5621
	102	±			102	0.117803	0.512546			-0.767828
Zhao et al. (2017)	74	±	1	U-Pb (Zr)	74	0.105798	0.512683	0.198329	0.705173	1.73651	0.704964
	74	±	1	U-Pb (Zr)	74	0.105121	0.512595	0.131882	0.705007	0.025972	0.704868
	75	±	1	U-Pb (Zr)	75	0.115837	0.512464	1.5781	0.708026	-2.6208	0.706344
	75	±	1	U-Pb (Zr)	75	0.132586	0.512595	1.33922	0.707794	-0.22524	0.706367
	67	±	1	U-Pb (Zr)	67	0.126187	0.512474	0.511722	0.706532	-2.59673	0.706045
	79	±	1	U-Pb (Zr)	79	0.108628	0.512428	2.2871	0.709348	-3.20924	0.706781
	79	±	1	U-Pb (Zr)	79	0.113136	0.5124	2.413	0.709324	-3.80099	0.706616
	80	±	1	U-Pb (Zr)	80	0.132147	0.512421	9.18319	0.72042	-3.57472	0.709982
	80	±	1	U-Pb (Zr)	80	0.126513	0.512476	12.8804	0.725942	-2.4441	0.711302
	57	±	1	U-Pb (Zr)	57	0.11657	0.512458	5.99228	0.711741	-2.92887	0.706889
	57	±	1	U-Pb (Zr)	57	0.120671	0.512478	7.58998	0.712832	-2.56851	0.706686
	64	±	1	U-Pb (Zr)	64	0.131615	0.512558	0.53469	0.7058	-1.0292	0.705314
	64	±	1	U-Pb (Zr)	64	0.131325	0.512665	0.539157	0.705839	1.06074	0.705349
	67	±	1	U-Pb (Zr)	67	0.118235	0.512577	3.13154	0.708925	-0.51918	0.705944
	67	±	1	U-Pb (Zr)	67	0.12828	0.512527	3.20271	0.709117	-1.58059	0.706068
	102	±	1	U-Pb (Zr)	102	0.119707	0.512451	1.23567	0.707099	-2.64625	0.705308
Wu et al. (2017)	39	±		K-Ar	39	0.0970696	0.512664	0.332152	0.704814	1.00842	0.70463
	39	±		K-Ar	39	0.102172	0.512713	0.299065	0.704431	1.94004	0.704265
	39	±		K-Ar	39	0.101916	0.512683	0.402501	0.704702	1.34202	0.704479
	39	±		K-Ar	39	0.0940251	0.512691	0.448455	0.70469	1.53645	0.704442
	44.9	±	1.3	U-Pb (Zr)	45	0.100124	0.512714	0.166769	0.704829	2.03378	0.704722
	44.9	±	1.3	U-Pb (Zr)	45	0.107999	0.512722	0.149568	0.704509	2.14624	0.704413
	44.9	±	1.3	U-Pb (Zr)	45	0.102125	0.512596	2.74111	0.705629	-0.27823	0.703877
	44.9	±	1.3	U-Pb (Zr)	45	0.0972799	0.512633	0.162895	0.705026	0.472128	0.704922
	42.6	±	1	U-Pb (Zr)	43	0.0890712	0.512624	0.344425	0.705318	0.315702	0.705108
	44.9	±	1.3	U-Pb (Zr)	45	0.0888155	0.512621	0.332045	0.70517	0.282898	0.704958
	44.9	±	1.3	U-Pb (Zr)	45	0.0925347	0.512597	0.255543	0.705209	-0.204788	0.705046
	44.9	±	1.3	U-Pb (Zr)	45	0.0952669	0.512505	0.325465	0.705966	-2.01375	0.705758
	44.9	±	1.3	U-Pb (Zr)	45	0.0977576	0.512508	0.284052	0.705936	-1.97731	0.705754
	44	±			44	0.125422	0.512511	1.06701	0.706913	-2.08289	0.706246
	44.9	±	1.3	U-Pb (Zr)	45	0.128389	0.512685	0.425993	0.704795	1.30971	0.704523
	44.9	±	1.3	U-Pb (Zr)	45	0.113382	0.512843	0.31247	0.704048	4.48471	0.703848
	44.9	±	1.3	U-Pb (Zr)	45	0.115207	0.512723	0.167661	0.704425	2.12515	0.704318

## Sheet: Sakhalin
Reference	Age (Ma)				147Sm/144Nd	143Nd/144Nd	87Rb/86Sr	87Sr/86Sr	εNd(T)	(87Sr/86Sr)0
Liao et al. (2018)	43.2	±	0.5	U-Pb (Zr)	0.146265	0.512813	2.798	0.706415	3.69212	0.704698
	43.5	±	0.8	U-Pb (Zr)	0.149564	0.512808	3.25755	0.706795	3.57819	0.704782
	42.6	±	0.6	U-Pb (Zr)	0.147862	0.512816	3.07003	0.706661	3.73809	0.704803
	43	±	0.6	U-Pb (Zr)	0.149154	0.512802	2.55494	0.706289	3.46037	0.704728
	42.1	±	0.8	U-Pb (Zr)	0.146713	0.512721	3.0953	0.705444	1.88779	0.703593
	43	±	0.6	U-Pb (Zr)	0.145806	0.512815	1.35499	0.706573	3.73236	0.705745
	44.1	±	0.5	U-Pb (Zr)	0.140367	0.512783	4.24424	0.705648	3.14584	0.702989
	42.1	±	0.8	U-Pb (Zr)	0.15114	0.512832	0.756073	0.708589	4.02892	0.708138
	42.9	±	0.8	U-Pb (Zr)	0.150165	0.512736	0.5244	0.707061	2.17496	0.706731
	42.7	±	0.5	U-Pb (Zr)	0.142861	0.512728	0.468811	0.706985	2.04917	0.706701
	42.9	±	0.8	U-Pb (Zr)	0.127113	0.512813	2.03674	0.707287	3.79058	0.70606
	40.5	±	0.5	U-Pb (Zr)	0.165694	0.512718	5.04774	0.707402	1.72095	0.704498
	40.9	±	0.5	U-Pb (Zr)	0.12567	0.512659	1.90615	0.706394	0.780398	0.705287
	40.2	±	0.6	U-Pb (Zr)	0.136317	0.512666	2.40482	0.706785	0.855999	0.705412
	41.3	±	1	U-Pb (Zr)	0.132837	0.512661	1.71926	0.706344	0.785273	0.705335
	40	±			0.144917	0.5128	0.273908	0.704561	3.42475	0.704405
	40	±			0.133984	0.512658	1.64386	0.706359	0.710295	0.705425
	40.5	±	0.7	U-Pb (Zr)	0.184584	0.512673	5.19963	0.708149	0.745429	0.705158
	40.5	±	0.9	U-Pb (Zr)	0.131299	0.512647	1.49366	0.706241	0.513575	0.705382
	40.2	±	0.6	U-Pb (Zr)	0.198338	0.512678	10.3414	0.710686	0.771953	0.704781
	40.7	±	0.7	U-Pb (Zr)	0.132451	0.512664	1.98286	0.706564	0.84091	0.705418
